# Supplementary material
Source: publisher figshare collection journal article supplement (https://sage.figshare.com/ndownloader/files/15254432)
Supplement: Supplementary file 1 [file 15254432]

**Supplemental Table 1. Independent risk factor associated with post-sepsis MI and stroke identified by traditional Cox model using cause-specific hazard**

| **Risk factors** | **Hazard Ratio (95% confidence interval)** |
| --- | --- |
| Myocardial infarction | 2.35 (1.86, 2.96) |
| Cerebrovascular disease | 1.67 (1.34, 2.08) |
| Diabetes without chronic complications | 1.57 (1.30, 1.89) |
| Severe Sepsis, shock | 1.40 (1.13, 1.73) |
| Hemiplegia or paraplegia | 1.32 (1.05, 1.68) |
| Number of hospitalization | 1.06 (1.03, 1.08) |
| Liver failure | 1.67 (1.19, 2.33) |
| Age | 1.01 (1.01, 1.02) |
| Dementia | 0.72 (0.56, 0.92) |
| Any malignancy | 0.71 (0.55, 0.92) |
| Metastatic solid tumor | 0.47 (0.24, 0.90) |
| Acute central nervous system dysfunction | 0.57 (0.40, 0.82) |
| Hyperglycemic crisis | 0.57 (0.42, 0.78) |

**Supplemental Table 2. Independent risk factor associated with post-sepsis MI identified by cumulative incidence competing risk model**

| **Independent risk factor** | **Hazard Ratio (95% confidence interval)** |
| --- | --- |
| Previous myocardial infarction | 5.83 (3.92,8.67) |
| Diabetes mellitus | 2.02 (1.48,2.76) |
| Lower respiratory tract infection | 1.91 (1.37,2.66) |
| Intra-abdomen infection | 1.59 (1.16,2.17) |
| Previous cerebrovascular disease | 1.19 (0.86,1.66) |

**Supplemental Table 3. Independent risk factor associated with post-sepsis stroke identified by cumulative incidence competing risk model**

| **Independent risk factor** | **Hazard Ratio (95% confidence interval)** |
| --- | --- |
| Previous cerebrovascular disease | 2.78 (2.38,3.25) |
| Intra-abdomen infection | 2.07 (1.78,2.40) |
| Central nervous system dysfunction | 1.87 (1.44,2.47) |
| Hyperglycemic crisis | 1.77 (1.39,2.25) |
| Lower respiratory tract infection | 1.52 (1.31,1.77) |
| Bed-ridden status | 1.36 (1.07,1.72) |
| Aged 70 and older | 1.34 (1.14,1.57) |
| Diabetes mellitus | 1.23 (1.06,1.43) |
| Male gender | 1.23 (1.06,1.42) |
